# Supplementary material for: Progression of Pulmonary Emphysema and Continued Increase in Ectodomain Shedding of Cell Adhesion Molecule 1 After Cessation of Cigarette Smoke Exposure in Mice
Source: PubMed Central journal article supplement (PMC5985719; doi:10.3389/fcell.2018.00052), 2018-05-28
Supplement: Data_Sheet_1.pdf [file Data_Sheet_1.pdf]

**Table S1. Measurements of suspended particulates during smoke exposure.**

|     | 0.3 $\mu\text{m}$ |            | 0.5 $\mu\text{m}$ |            | 1.0 $\mu\text{m}$ |            |
|-----|-------------------|------------|-------------------|------------|-------------------|------------|
| min | Average           | SD         | Average           | SD         | Average           | SD         |
| 0   | 5.937.E+06        | 2.408.E+05 | 3.383.E+05        | 1.915.E+04 | 2.426.E+04        | 2.272.E+03 |
| 15  | 4.674.E+08        | 1.551.E+07 | 4.481.E+08        | 1.369.E+07 | 3.599.E+08        | 1.515.E+07 |
| 30  | 4.978.E+08        | 2.023.E+06 | 4.659.E+08        | 7.374.E+06 | 3.332.E+08        | 2.332.E+07 |
| 45  | 4.786.E+08        | 2.801.E+06 | 3.751.E+08        | 7.382.E+06 | 3.390.E+08        | 9.062.E+06 |
| 60  | 4.681.E+08        | 5.134.E+06 | 3.653.E+08        | 4.909.E+06 | 3.398.E+08        | 2.102.E+06 |

|     | 2.0 $\mu\text{m}$ |            | 5.0 $\mu\text{m}$ |            | 10.0 $\mu\text{m}$ |            |
|-----|-------------------|------------|-------------------|------------|--------------------|------------|
| min | Average           | SD         | Average           | SD         | Average            | SD         |
| 0   | 2.238.E+04        | 2.353.E+03 | 0                 | 0          | 0                  | 0          |
| 15  | 3.563.E+08        | 1.545.E+07 | 2.466.E+05        | 1.949.E+05 | 1.126.E+04         | 1.380.E+03 |
| 30  | 3.282.E+08        | 2.376.E+07 | 1.237.E+04        | 1.540.E+03 | 2.120.E+03         | 9.349.E+02 |
| 45  | 2.988.E+08        | 5.981.E+07 | 1.979.E+05        | 1.164.E+05 | 1.084.E+04         | 1.471.E+03 |
| 60  | 2.999.E+08        | 5.693.E+07 | 1.085.E+04        | 1.153.E+03 | 5.791.E+03         | 3.789.E+02 |

The numbers of suspended particulates with indicated diameters were counted every 15 minutes after the initiation of cigarette burning, using an air particulate counter (MET ONE HHPC 6+). SD, standard deviation.

| min | Average | SD    |
|-----|---------|-------|
| 10  | 16.79   | 0.007 |
| 20  | 16.86   | 0.006 |
| 30  | 16.86   | 0.001 |
| 40  | 16.88   | 0.001 |
| 50  | 16.88   | 0.001 |
| 60  | 16.89   | 0.002 |

Concentrations of cigarette dusts ( $\text{mg}/\text{m}^3$ ) were measured every 10 minutes after the initiation of cigarette burning, using a digital dust indicator (LD-5R). SD, standard deviation.

**Figure S1**

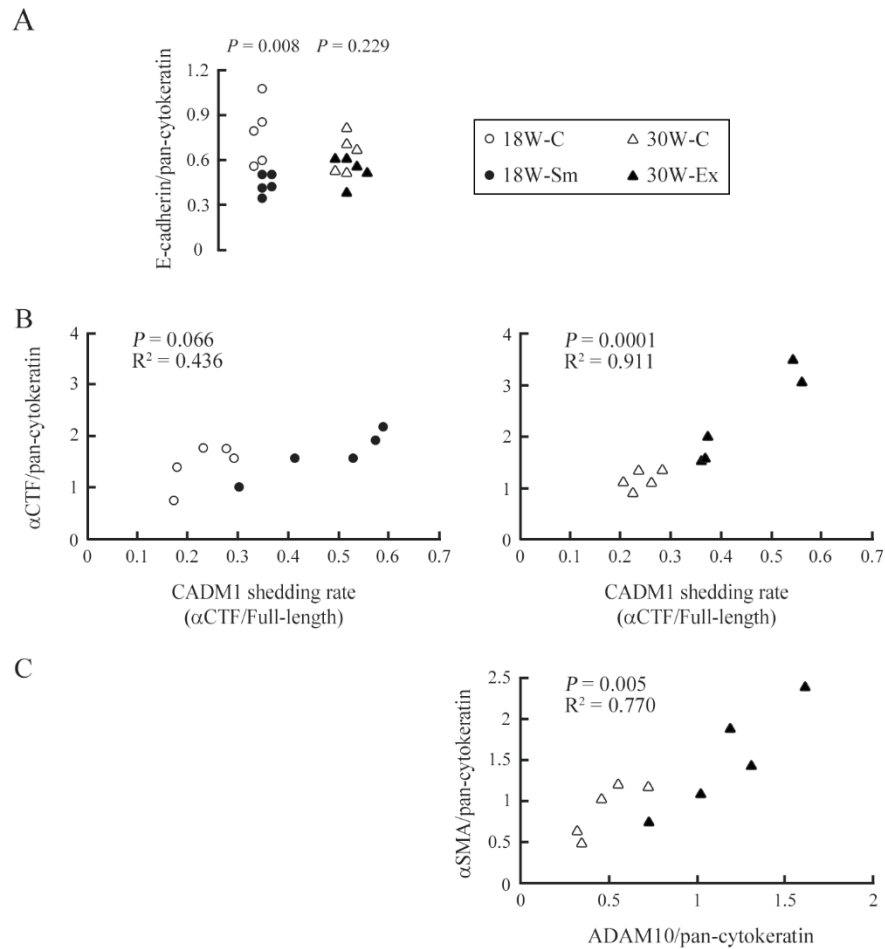

**Figure S1. Statistical analyses of the expressions of CADM1 and related molecules.**

(A) The E-cadherin levels per lung epithelial cell (relative to pan-cytokeratin) are plotted as dots in each of the four experimental groups. Statistical significance between the two groups of the same age was analyzed using paired Student's *t*-test. *P*-values are shown. (B) The αCTF level per epithelial cell is shown in the scatter plots with CADM1 shedding rate. Left, 18-week-old mice (*n* = 10); right, 30-week-old mice (*n* = 10). Correlations and statistical significance were analyzed using Spearman's rank test. *P*-values and *R*<sup>2</sup> are shown. (C) The αSMA level per epithelial cell (relative to pan-cytokeratin) is scatter plotted with the ADAM10 level per epithelial cell (30-week-old

mice,  $n = 10$ ). Correlation and statistical significance were analyzed using Spearman's rank test.  $P$ -value and  $R^2$  are shown.

Figure S2

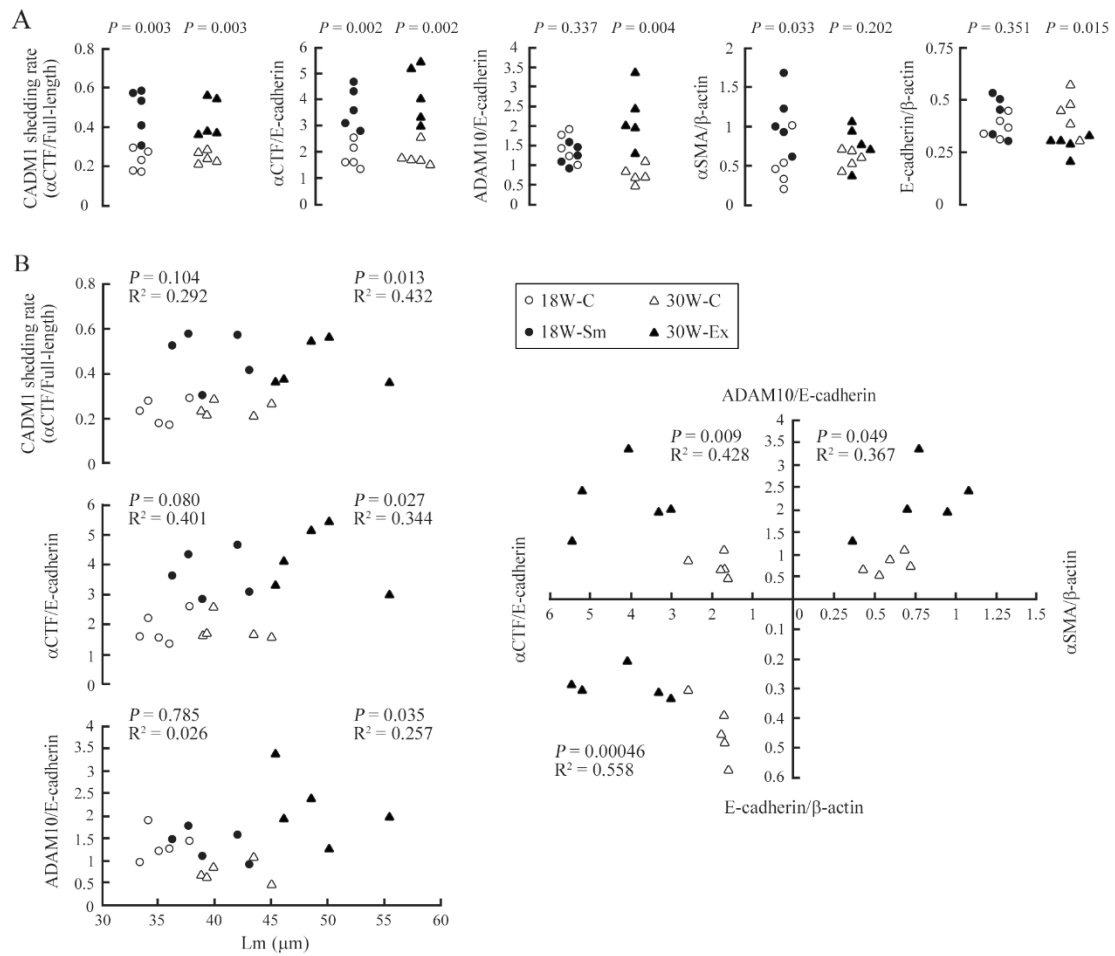

**Figure S2. Statistical analyses of the expressions of CADM1 and related molecules using E-cadherin as an epithelial marker**

(A) CADM1 ectodomain shedding rates (amount of  $\alpha$ CTF relative to full-length CADM1),  $\alpha$ CTF and ADAM10 levels per lung epithelial cell (relative to E-cadherin), and  $\alpha$ SMA and E-cadherin levels per tissue (relative to  $\beta$ -actin) are plotted as dots in each group. Statistical significance between the two groups of the same age was analyzed using paired Student's *t*-test. *P*-values are shown. (B) The CADM1 shedding rate,  $\alpha$ CTF level per epithelial cell, and ADAM10 level per tissue are shown in the upper three scatter plots with Lm. In the right graph, the  $\alpha$ CTF and ADAM10 levels per

epithelial cell, and  $\alpha$ SMA and E-cadherin levels per tissue are scatter plotted with each other. Correlations and statistical significance were analyzed using Spearman's rank test.  $P$ -values and  $R^2$  are shown.
